# Supplementary material for: pH-Dependent assembly of two octamolybdate hybrid materials: A self-threading CdSO4-type framework and a 3D 4-connected framework
Source: Royal Society of Chemistry journal article supplement (doi:10.1039/c1ce06000g), 2011-01-01
Supplement: c1ce06000g.pdf [file c1ce06000g.pdf]

Supplementary Material (ESI) for CrystEngComm

**pH-Dependent assembly of octamolybdate hybrid materials: a self-threading CdSO<sub>4</sub>-type framework and a 3D 4-connected framework**

**Wei-Qiu Kan, Jian-Fang Ma\*, Ying-Ying Liu, Hua Wu and Jin Yang\***

*Key Lab of Polyoxometalate Science, Department of Chemistry, Northeast Normal University, Changchun 130024, People's Republic of China*

\* Correspondence authors

E-mail: jianfangma@yahoo.com.cn (J.-F. Ma)

Fax: +86-431-85098620 (J.-F. Ma)

E-mail: yangjinnenu@yahoo.com.cn (J. Yang)

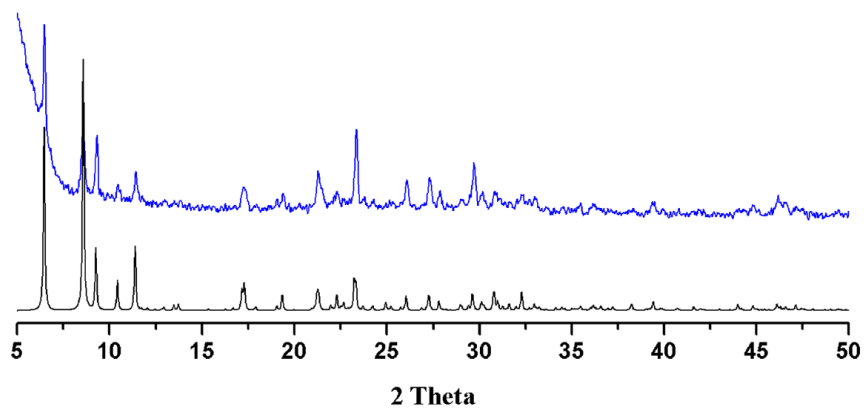

**Fig. S1** Simulated (black) and measured (blue) PXR D patterns of **1**.

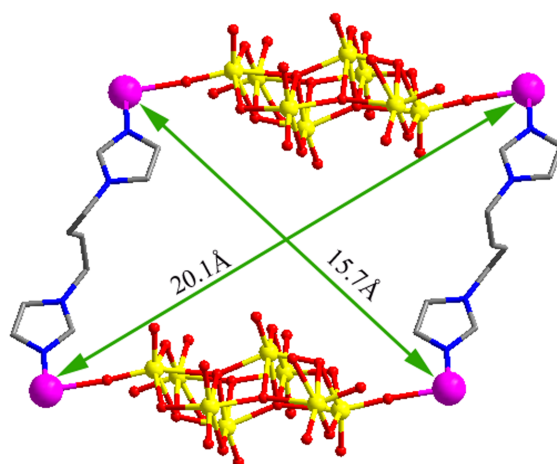

**Fig. S2** View of the window constructed by four Co(II) ions, two L ligands and two [H<sub>2</sub>Mo<sub>8</sub>O<sub>28</sub>]<sup>6-</sup> anions.

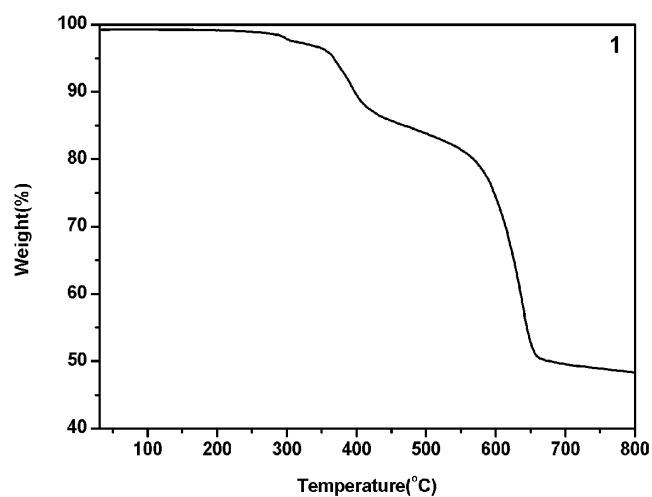

**Fig. S3** The TGA curve of compound **1**.
